# Supplementary material for: Role of extracellular matrix components and structure in new renal models in vitro
Source: PubMed Central journal article supplement (PMC9767975; doi:10.3389/fphys.2022.1048738), 2022-12-07
Supplement: DataSheet1.pdf [file DataSheet1.pdf]

## SUPPLEMENTAL MATERIALS

Role of extracellular matrix components and structure in new renal models *in vitro*

Alodia Lacueva-Aparicio<sup>1,2</sup>, Rafael Soares Lindoso<sup>3</sup>, Silvia M. Mihăilă<sup>4</sup>, Ignacio Giménez<sup>1,5,6</sup>

### Supplemental Figure 1

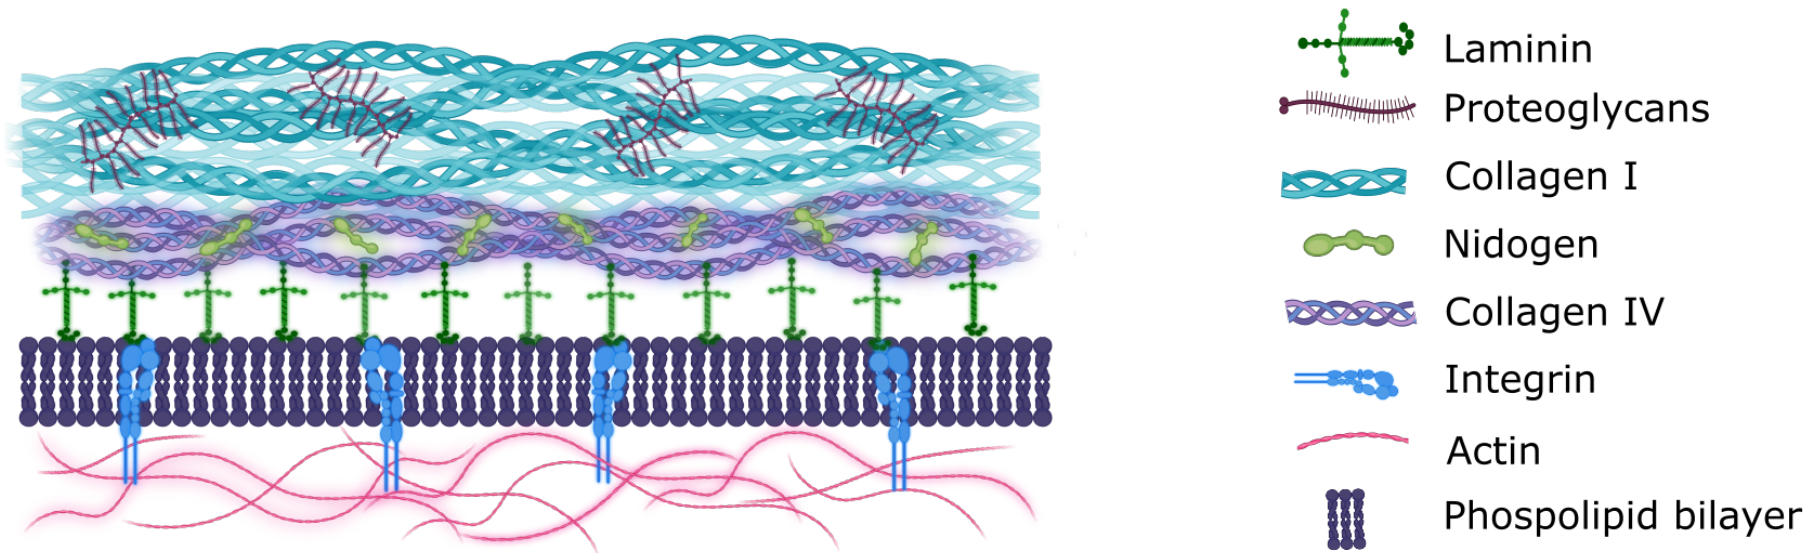

**Figure S1.** The extracellular matrix is mainly composed of proteoglycans, hyaluronic acid and collagen I. Proteoglycans are a core protein to which GAGs are attached, like hyaluronic acid. Proteoglycans have an important role in different biological functions, and they also interact with growth factors and take part in cell signaling. Collagen I is a fibril-forming collagen, and it is involved in the organization and the architecture of the specific tissue. Nidogen, collagen IV and laminins are part of the basal membrane. Laminins interweave with collagen IV network and nidogen acts as a connector or linking protein. Integrins are heterodimeric receptors that connect the ECM and the cytoskeleton. A licensed version of BioRender was used to prepare this figure.

## Supplemental Tables

**Supplementary Table 1.** ECM components and their natural and synthetic surrogates

| Component                                                                         | Molecular nature              | Application | References                                                                                          |
|-----------------------------------------------------------------------------------|-------------------------------|-------------|-----------------------------------------------------------------------------------------------------|
| <b>Individual ECM/BM components</b>                                               |                               |             |                                                                                                     |
| Collagens                                                                         |                               |             |                                                                                                     |
| <ul style="list-style-type: none"> <li>Collagen I</li> </ul>                      | Isolated fraction, purified   | 2D Coating  | (34,63)                                                                                             |
|                                                                                   |                               | 2.5 D       | (11)                                                                                                |
|                                                                                   |                               | 3D Hydrogel | (23,68,74)                                                                                          |
|                                                                                   |                               | Bioprinting | (105)                                                                                               |
| <ul style="list-style-type: none"> <li>Collagen IV</li> </ul>                     | Isolated fraction, purified   | 2D Coating  | (34,60)                                                                                             |
| <ul style="list-style-type: none"> <li>Jellyfish Collagen 0 (Jellagen)</li> </ul> | Isolated fraction             | 3D scaffold | <a href="https://www.biotrend.com/en/brand/Jellagen">https://www.biotrend.com/en/brand/Jellagen</a> |
| Laminins                                                                          | Recombinant                   | Coating     | (34,60)                                                                                             |
| Fibronectin                                                                       | Isolated fraction, purified   | Coating     | (60)                                                                                                |
| GAGs                                                                              |                               |             |                                                                                                     |
| <ul style="list-style-type: none"> <li>Hyaluronic Acid</li> </ul>                 | Isolated fraction, purified   | 3D hydrogel | (85)                                                                                                |
| <ul style="list-style-type: none"> <li>Heparin</li> </ul>                         | Isolated fraction, purified   | 3D hydrogel | (17)                                                                                                |
| <b>Native ECM/BM extracts</b>                                                     |                               |             |                                                                                                     |
| Matrigel                                                                          | Unfractionated tissue Extract | 2.5D        | (11,81)                                                                                             |
|                                                                                   |                               | Coating     | (60)                                                                                                |

|                           |                               |                              |            |
|---------------------------|-------------------------------|------------------------------|------------|
|                           |                               | 3D Hydrogel                  | (67)       |
| Geltrex                   | Unfractionated tissue Extract | Coating                      | (139,141)  |
| NovoGel                   |                               | Bioprinting                  | (46)       |
| Specific Renal ECM        | Decellularized kidney         | Recellularization            | (43,114)   |
|                           |                               | ECM extracts                 | (88)       |
|                           |                               | Bioinks                      | (100,101)  |
| <b>Natural polymers</b>   |                               |                              |            |
| Gelbrin                   |                               | 3D Scaffold                  | (32)       |
| Silk                      |                               | 3D Scaffold                  | (86,90,91) |
| <b>Synthetic polymers</b> |                               |                              |            |
| PEG                       | Monomer solution              | Hydrogel                     | (30,87)    |
| starPEG                   | Monomer solution              | Hydrogel                     | (17)       |
| EDC                       | Monomer solution              | Hollow fiber hydrogel        | (55)       |
| microPES                  | Monomer solution              | Membrane<br>HFM              | (52,56)    |
| PCLdi(u-UPy)              | Monomer solution              | Electrospun membrane         | (51)       |
| PES                       | Monomer solution              | Membrane                     | (13,65)    |
| PCL                       | Monomer solution              | Electrospun polymer scaffold | (57)       |
| Polyester fleece          | Monomer solution              | Scaffold                     | (50)       |
| h- FIBER                  | Monomer solution              | HFM                          | (54)       |

ECM: Extracellular Membrane, BM: Basal Membrane; GAGs: glycosaminoglycans

Matrigel: murine EHM tumor tissue, Gelbrin: Gelatin-Fibrin, PEG: polyethylene glycol, PEGDA: poly (ethylene glycol) diacrylate biofunctional polymer, EDC: 1-ethyl-3-(3- (dimethylamino)propyl) carbodiimide hydrochloride, HFM: hollow fiber membrane, PES: Polyethersulfone, PCL: polycaprolactone, h-FIBER: Extruded topographic hollow fiber

**Supplementary Table 2.** Commercial solutions for organ-on-a-chip technology

| Company         | Internet address                                                                | Kidney model* |
|-----------------|---------------------------------------------------------------------------------|---------------|
| 4Dcell          | <a href="https://www.4dcell.com/">https://www.4dcell.com/</a>                   | No            |
| AlveoliX        | <a href="https://www.alveolix.com/">https://www.alveolix.com/</a>               | No            |
| AxoSim          | <a href="https://axosim.com/">https://axosim.com/</a>                           | No            |
| BEOnChip        | <a href="https://beonchip.com/">https://beonchip.com/</a>                       | Yes           |
| BioIVT          | <a href="https://bioivt.com/">https://bioivt.com/</a>                           | No            |
| BiomimX         | <a href="https://www.biomimx.com/">https://www.biomimx.com/</a>                 | No            |
| Cherry Biotech  | <a href="https://www.cherrybiotech.com/">https://www.cherrybiotech.com/</a>     | No            |
| Elvesys         | <a href="https://www.elveflow.com/">https://www.elveflow.com/</a>               | No            |
| Emulate         | <a href="https://emulatebio.com/">https://emulatebio.com/</a>                   | Yes           |
| Ibidi           | <a href="https://ibidi.com/">https://ibidi.com/</a>                             | No            |
| Insphero        | <a href="https://insphero.com/">https://insphero.com/</a>                       | No            |
| MesoBioTech     | <a href="https://mesobiotech.com/">https://mesobiotech.com/</a>                 | No            |
| Mimetas         | <a href="https://www.mimetas.com/en/home/">https://www.mimetas.com/en/home/</a> | Yes           |
| Nortis Bio      | <a href="https://nortisbio.com/">https://nortisbio.com/</a>                     | Yes           |
| TARA Biosystems | <a href="https://tarabiosystems.com/">https://tarabiosystems.com/</a>           | No            |
| TissUse         | <a href="https://www.tissuse.com/en/">https://www.tissuse.com/en/</a>           | No            |

\*Company specifically offers devices or models to model kidney tubule function.
